# Supplementary material
Source: ML conference proceedings conference paper supplement (https://www.ecva.net/papers/eccv_2024/papers_ECCV/html/7708_ECCV_2024_paper.php)
Supplement: Supplementary file 1 [file 07708-supp.pdf]

# Pseudo-keypoint RKHS Learning for Self-supervised 6DoF Pose Estimation (Supplementary Material)

Yangzheng Wu<sup>✉</sup> and Michael Greenspan<sup>✉</sup>

RCVLab, Dept. of Electrical and Computer Engineering, Ingenuity Labs,  
Queen’s University, Kingston, Ontario, Canada  
{y.wu, michael.greenspan}@queensu.ca

## S.1 Overview

We document here some addition implementation details and results. The detailed structures of keypoint radial voting network  $M_v$  and Convolutional RKHS Adapter  $M_A$  are described in Sec. S.2 and shown in Figs. S.2 and S.1. Sec. S.3 describes the visualized radial pattern (shown in Fig. S.3) of the dragon object in TUDL, which inspired us to use a CNN ( $M_v$ ) to simulate the voting process. The  $AR_{VSD}$ ,  $AR_{MSSD}$ ,  $AR_{MSPD}$ , and  $AR$  results of all datasets we used for all ablation studies are summarized in Sec. S.4 and listed in Fig. S.4 and Tables S.1, S.2, S.3, and S.4. The detailed ADD(S) results for each category of object on LM and LMO are listed in Tables S.6 and S.5, and ADD-S AUC results on YCB are shown in Table S.7.

## S.2 Network Diagrams

The structure of Adapter network  $M_A$  is shown in Fig. S.1. Each conv block comprises  $3 \times 3$  convolution, batch normalization, and ReLu layers. Inputs of  $M_A$ , *i.e.* x8s, x4s, x2s, upx2s, upx4s, and upx8s are feature maps extracted from each step of  $M_r$ . x8s stands for the 8th step of the encoding ResNet block, and upx8s is the 8th step of the decoding block, etc. Outputs of each column of conv blocks are concatenated and mapped into RKHS by a linear layer.

The keypoint radial voting network  $M_v$  structure is shown in Fig. S.2. The input of  $M_v$  is the inversed radial map  $\hat{V}_r^{-1}$ , defined in the main paper.  $M_v$  comprises 5 convolution layers with a kernel size of 3 and stride of 1. A linear layer maps the feature map into the shape of  $n \times 4$  comprising  $n \times 2$  projected 2D keypoints  $K$ ,  $n$  classification labels  $C$ , and  $n$  confidence scores  $S$ .

Estimated keypoints are organized into clusters based on geometric constraints when multiple instances of the same object appear within an image. More precisely, the estimated keypoints are grouped into instance sets by sorting the mean absolute differences of the Euclidean distances between keypoints defined on the CAD model, and those being estimated.

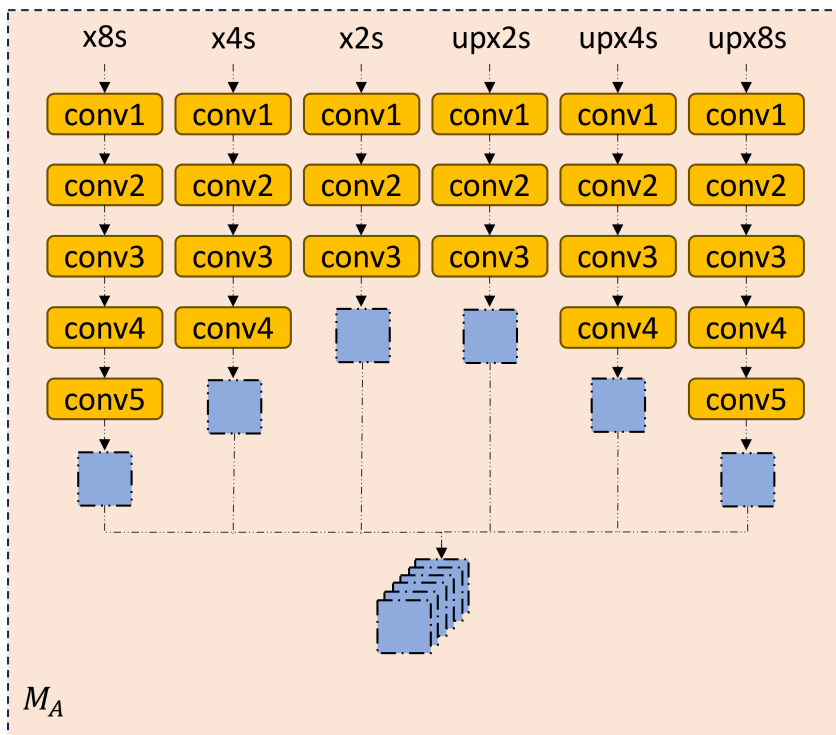

Fig. S.1: Convolutional RKHS Adapter  $M_A$  detailed structure.

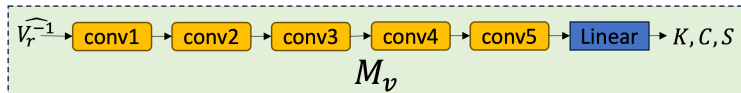

Fig. S.2: Keypoint radial voting network  $M_v$  detailed structure. Each conv block comprises a  $3 \times 3$  convolution, batch normalization, and ReLu layer. The final linear layer reshapes the feature map into the output  $K, C, S$ .

### S.3 Radii Pattern for Keypoint Voting

As shown in Fig. S.3, the estimated radial map  $\widehat{V}_r$  is an inverse heat map of the candidate keypoints' locations, distributed in a radial pattern centered at the keypoints. The further away from the pixel to the keypoint,  $\widehat{V}_r$  has a greater value. Pixels with value  $-1$  do not lie on an object. This inspired us to use a CNN ( $M_v$ ) to detect the peak, thereby localizing the keypoint.

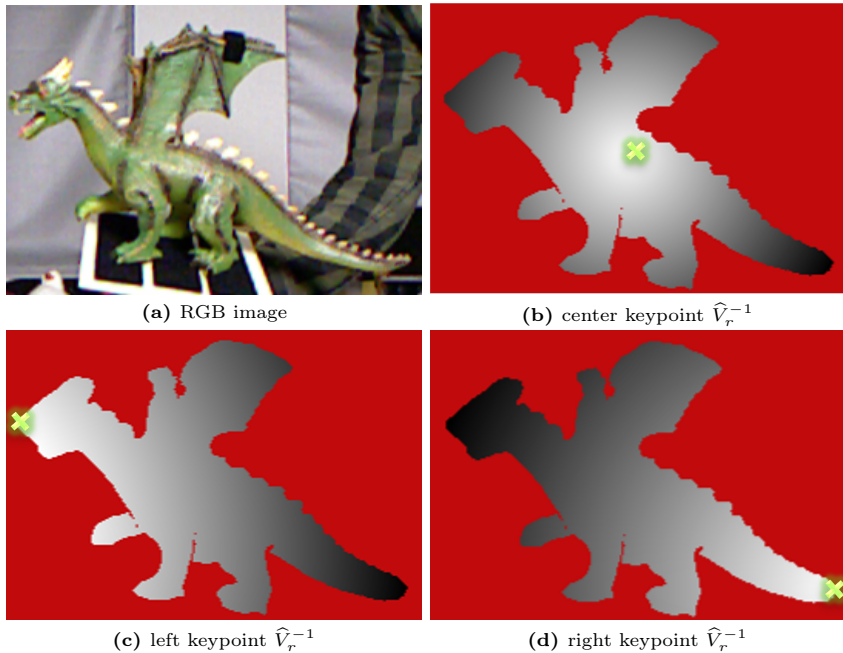

**Fig. S.3:** TUDL [S.3] dataset dragon object (a) RGB image and (b)-(d) inverse radial maps  $\widehat{V}_r^{-1}$ . The segmentation mask is applied to filter out the background, shown in red. Keypoints (pink stars) are located at the (b) center, (c) left, and (d) right.

### S.4 Ablation Studies

The  $AR_{VSD}$ ,  $AR_{MSSD}$ ,  $AR_{MSPD}$ , and  $AR$  results for all datasets used for all ablation studies are provided here.

Table S.1 shows the dataset-wise performance when sparse  $M_A^S$  and dense  $M_A$  RKHS Adapters are used to reduce the sim2real domain gap.  $M_A$  performs better on all datasets than  $M_A^S$ .

Table S.2 demonstrates the impact of different kernels used in  $M_A$  including linear and RBF kernels, both with and without trainable weights.  $M_A$  with trainable linear kernel performs the best compared to others.

Table S.3 compares different RKHS metrics including MMD, KL Div, and Wass Distances.  $M_A$  evaluated by MMD outperforms the other metrics.

Table S.4 illustrates the training strategies of the regression and voting model  $M_{rv}$  and the adapter  $M_A$ , whether sequentially or mixed. The mixed training is shown to lead to better (+2.5%) performance.

Lastly, the correlation between object size and accuracy is also evaluated on LM, LMO, and YCB datasets, and the results are shown in Fig. S.4. The object size impact on the accuracy has no significant impact except when there are extreme occlusions in LMO.

**Table S.1:** The impact of sparse ( $M_A^s$ ) and dense ( $M_A$ ) Adapters, defined in Sec. 5.1 in the main paper, on LM and LMO, and five BOP core datasets.

| Adapter | Dataset | $AR_{VSD}$ | $AR_{MSSD}$ | $AR_{MSPD}$ | $AR$        |
|---------|---------|------------|-------------|-------------|-------------|
| $M_A$   | LM      | 96.0       | 95.7        | 95.7        | 95.8        |
|         | LMO     | 68.7       | 68.2        | 68.2        | 68.4        |
|         | TLESS   | 85.9       | 85.1        | 85.8        | 85.6        |
|         | TUDL    | 97.6       | 96.4        | 95.4        | 96.2        |
|         | ITODD   | 69.2       | 68.5        | 68.4        | 68.7        |
|         | HB      | 92.7       | 91.6        | 92.5        | 92.3        |
|         | YCB     | 83.9       | 83.4        | 84          | 83.8        |
|         | average | 84.9       | 84.1        | 84.3        | <b>84.4</b> |
| $M_A^s$ | LM      | 93.4       | 92.7        | 92.6        | 92.9        |
|         | LMO     | 59.7       | 59.3        | 59.2        | 59.4        |
|         | TLESS   | 78.8       | 78.7        | 78.8        | 78.8        |
|         | TUDL    | 95.6       | 95.3        | 95.5        | 95.5        |
|         | ITODD   | 56.7       | 56.7        | 56.5        | 56.6        |
|         | HB      | 85.7       | 85.3        | 85.6        | 85.5        |
|         | YCB     | 76.5       | 76.4        | 76.6        | 76.5        |
|         | average | 78.1       | 77.8        | 77.8        | 77.9        |

**Table S.2:** The impact of different RKHS kernels defined in Sec. 5.3 in the main paper on LM and five BOP core datasets.

| Kernels | Trainable Weights ( $w$ ) | Dataset | $AR_{VSD}$ | $AR_{MSSD}$ | $AR_{MSPD}$ | $AR$        |
|---------|---------------------------|---------|------------|-------------|-------------|-------------|
| Linear  | $\times$                  | LM      | 85.4       | 84.2        | 84.4        | 84.7        |
|         |                           | LMO     | 56.9       | 56.3        | 55.4        | 56.2        |
|         |                           | TLESS   | 74.3       | 73.8        | 74.2        | 74.1        |
|         |                           | TUDL    | 88.2       | 87.3        | 84.3        | 86.6        |
|         |                           | ITODD   | 45.2       | 44.7        | 45.3        | 45.1        |
|         |                           | HB      | 79.3       | 78.6        | 79.2        | 79.0        |
|         |                           | YCB     | 72.2       | 70.5        | 71.3        | 71.3        |
|         |                           | average | 71.6       | 70.8        | 70.6        | 71.0        |
| RBF     | $\times$                  | LM      | 85.3       | 84.1        | 84.3        | 84.6        |
|         |                           | LMO     | 57.1       | 56.3        | 55.2        | 56.2        |
|         |                           | TLESS   | 73.7       | 73.1        | 73.6        | 73.5        |
|         |                           | TUDL    | 90.3       | 89.7        | 89.9        | 90.0        |
|         |                           | ITODD   | 52.7       | 51.9        | 52.5        | 52.4        |
|         |                           | HB      | 80.2       | 79.6        | 79.3        | 79.7        |
|         |                           | YCB     | 72.6       | 71.8        | 71.5        | 72.0        |
|         |                           | average | 73.4       | 72.9        | 73.2        | 73.2        |
| Linear  | $\checkmark$              | LM      | 96.0       | 95.7        | 95.7        | 95.8        |
|         |                           | LMO     | 68.7       | 68.2        | 68.2        | 68.4        |
|         |                           | TLESS   | 85.9       | 85.1        | 85.8        | 85.6        |
|         |                           | TUDL    | 97.6       | 96.4        | 95.4        | 96.2        |
|         |                           | ITODD   | 69.2       | 68.5        | 68.4        | 68.7        |
|         |                           | HB      | 92.7       | 91.6        | 92.5        | 92.3        |
|         |                           | YCB     | 83.9       | 83.4        | 84          | 83.8        |
|         |                           | average | 84.9       | 84.1        | 84.3        | <b>84.4</b> |
| RBF     | $\checkmark$              | LM      | 94.7       | 94.5        | 94.4        | 94.5        |
|         |                           | LMO     | 57.1       | 56.3        | 55.2        | 56.2        |
|         |                           | TLESS   | 83.7       | 82.9        | 83.3        | 83.3        |
|         |                           | TUDL    | 97.4       | 95.8        | 94.9        | 95.1        |
|         |                           | ITODD   | 66.7       | 63.6        | 64.2        | 64.7        |
|         |                           | HB      | 85.6       | 83.9        | 84.8        | 84.8        |
|         |                           | YCB     | 82.8       | 82.6        | 82.8        | 82.7        |
|         |                           | average | 82.5       | 81.3        | 81.5        | 81.6        |

**Table S.3:** The impact of different metrics defined in Sec. 5.3 in the main paper for  $M_A$  on LM and five BOP core datasets.

| Metrics          | Dataset | $AR_{VSD}$ | $AR_{MSSD}$ | $AR_{MSPD}$ | $AR$        |
|------------------|---------|------------|-------------|-------------|-------------|
| MMD              | LM      | 96.0       | 95.7        | 95.7        | 95.8        |
|                  | LMO     | 68.7       | 68.2        | 68.2        | 68.4        |
|                  | TLESS   | 85.9       | 85.1        | 85.8        | 85.6        |
|                  | TUDL    | 97.6       | 96.4        | 95.4        | 96.2        |
|                  | ITODD   | 69.2       | 68.5        | 68.4        | 68.7        |
|                  | HB      | 92.7       | 91.6        | 92.5        | 92.3        |
|                  | YCB     | 83.9       | 83.4        | 84          | 83.8        |
|                  | average | 84.9       | 84.1        | 84.3        | <b>84.4</b> |
| KL<br>Div        | LM      | 90.2       | 90.3        | 90.5        | 90.3        |
|                  | LMO     | 63.4       | 62.2        | 63.6        | 63.1        |
|                  | TLESS   | 79.8       | 79.7        | 80.2        | 79.9        |
|                  | TUDL    | 93.4       | 93.2        | 92.9        | 93.2        |
|                  | ITODD   | 62.1       | 62.2        | 62.1        | 62.1        |
|                  | HB      | 84.6       | 84.3        | 84.7        | 84.5        |
|                  | YCB     | 72.6       | 72.5        | 72.3        | 72.4        |
|                  | average | 78.0       | 77.8        | 78.0        | 77.9        |
| Wass<br>Distance | LM      | 92.3       | 91.7        | 92.2        | 92.1        |
|                  | LMO     | 64.7       | 64.2        | 64.7        | 64.5        |
|                  | TLESS   | 82.3       | 82.2        | 81.9        | 82.1        |
|                  | TUDL    | 95.7       | 95.6        | 95.5        | 95.6        |
|                  | ITODD   | 65.7       | 64.9        | 65.6        | 65.4        |
|                  | HB      | 89.3       | 89.1        | 89.5        | 89.3        |
|                  | YCB     | 76.5       | 76.3        | 76.6        | 76.4        |
|                  | average | 80.9       | 80.6        | 80.9        | 80.8        |

**Table S.4:** The impact of different training strategies described in Sec. 5.2 in the main paper on LM and five BOP core datasets.

| Training Type | Dataset | $AR_{VSD}$ | $AR_{MSSD}$ | $AR_{MSPD}$ | $AR$        |
|---------------|---------|------------|-------------|-------------|-------------|
| Mixed         | LM      | 96.0       | 95.7        | 95.7        | 95.8        |
|               | LMO     | 68.7       | 68.2        | 68.2        | 68.4        |
|               | TLESS   | 85.9       | 85.1        | 85.8        | 85.6        |
|               | TUDL    | 97.6       | 96.4        | 95.4        | 96.2        |
|               | ITODD   | 69.2       | 68.5        | 68.4        | 68.7        |
|               | HB      | 92.7       | 91.6        | 92.5        | 92.3        |
|               | YCB     | 83.9       | 83.4        | 84          | 83.8        |
|               | average | 84.9       | 84.1        | 84.3        | <b>84.4</b> |
| Sequential    | LM      | 95.4       | 95.2        | 95.3        | 95.3        |
|               | LMO     | 65.3       | 65.2        | 65.2        | 65.2        |
|               | TLESS   | 85.7       | 85.3        | 85.6        | 85.5        |
|               | TUDL    | 97.6       | 96.4        | 95.4        | 96.2        |
|               | ITODD   | 63.4       | 62.2        | 62.3        | 62.6        |
|               | HB      | 88.6       | 88.4        | 88.3        | 88.4        |
|               | YCB     | 79.8       | 79.5        | 80.0        | 79.8        |
|               | average | 82.3       | 81.7        | 81.7        | 81.9        |

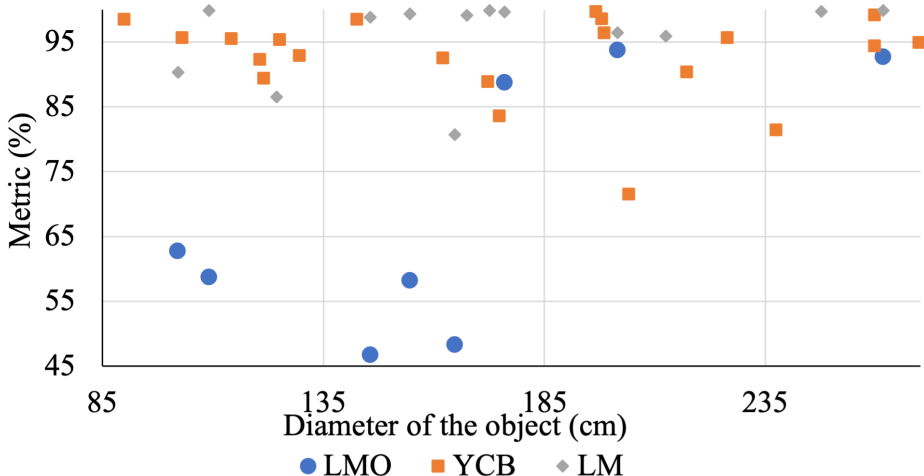

**Fig. S.4:** Impact of object size (diameter) on accuracy, for three datasets (LM, LMO, and YCB). There is no noticeable performance change for different object sizes, except for small heavily occluded objects in the LMO dataset.

## S.5 Category Wise Performance

The category-wise ADD(S), ADD-S AUC, and ADD(S) AUC results for LINEMOD-Occlusion, LINEMOD, and YCB-Video are shown in Tables S.5, S.6, and Table S.7. RKHS Pose outperforms on average against all self-supervised methods and most of the object categories.

**Table S.5:** LMO accuracy results of self-supervised 6DOF PE methods: accuracy of RKHS Pose for non-symmetric objects is evaluated with ADD, and for symmetric objects (annotated with \*) is evaluated with ADD-S. All the syn + real image methods use real images without GT labels. The methods annotated with \*\* are the TexPose [S.1] re-implementation.

| Mode                 | Method                  | Object      |             |             |             |             |             |             |              | Mean        |
|----------------------|-------------------------|-------------|-------------|-------------|-------------|-------------|-------------|-------------|--------------|-------------|
|                      |                         | ape         | can         | cat         | driller     | duck        | eggbox*     | glue*       | hole-puncher |             |
| syn                  | GDR [S.12]              | 44          | 83.9        | 49.1        | 88.5        | 15          | 33.9        | 75          | 34           | 52.9        |
|                      | Self6D [S.11]           | 13.7        | 43.2        | 18.7        | 32.5        | 14.4        | <b>57.8</b> | 54.3        | 22           | 32.1        |
|                      | Sock et al. [S.7]       | 12          | 27.5        | 12          | 20.5        | 23          | 25.1        | 27          | 35           | 22.8        |
|                      | DSC [S.14]              | 9.1         | 21.1        | 26          | 33.5        | 12.2        | 39.4        | 37          | 20.4         | 24.8        |
| syn + real<br>images | SMOC-Net [S.9]          | 60.0        | <u>94.5</u> | <u>59.1</u> | <b>93.0</b> | 37.2        | 48.3        | <b>89.3</b> | 25.0         | 63.3        |
|                      | Self6D++ ** [S.1, S.10] | 59.4        | <b>96.5</b> | <b>60.8</b> | 92          | 30.6        | <u>51.1</u> | 88.6        | 38.5         | 64.7        |
|                      | TexPose [S.1]           | <u>60.5</u> | 93.4        | 56.1        | 92.5        | <u>55.5</u> | 46          | 82.8        | <u>46.5</u>  | 66.7        |
|                      | Ours                    | <b>62.7</b> | 93.5        | 58.2        | 92.5        | <b>58.7</b> | 48.2        | <u>88.7</u> | <u>46.5</u>  | <u>68.6</u> |
|                      | Ours+ICP                | <b>62.7</b> | 93.7        | 58.2        | <u>92.7</u> | <b>58.7</b> | 48.3        | <u>88.7</u> | <b>46.7</b>  | <b>68.7</b> |



**Table S.6:** LINEMOD Accuracy Results of self-supervised 6DOF PE methods: Non-symmetric objects are evaluated with ADD, and symmetric objects (annotated with \*) are evaluated with ADD-S. All the syn + real image methods use real images without GT labels. The methods annotated with \*\* are the TexPose [S.1] re-implementations. DeepIM annotated with # is the self6D++ re-implementation.

| Mode                    | Method                      | Object      |             |             |             |             |              |             |             |             |             |              | mean        |             |             |
|-------------------------|-----------------------------|-------------|-------------|-------------|-------------|-------------|--------------|-------------|-------------|-------------|-------------|--------------|-------------|-------------|-------------|
|                         |                             | bench-      |             |             |             |             | hole-        |             |             |             |             |              |             |             |             |
|                         |                             | ape         | vise        | camera      | can         | cat         | driller      | duck        | eggbox*     | glue*       | puncher     | iron         | lamp        | phone       |             |
| syn                     | AAE [S.8]                   | 4.0         | 20.9        | 30.5        | 35.9        | 17.9        | 24.0         | 4.9         | 81.0        | 45.5        | 17.6        | 32.0         | 60.5        | 33.8        | 31.4        |
|                         | MHP [S.5]                   | 11.9        | 66.2        | 22.4        | 59.8        | 26.9        | 44.6         | 8.3         | 55.7        | 54.6        | 15.5        | 60.8         | -           | 34.4        | 38.8        |
|                         | DeepIM# [S.4, S.10]         | 85.8        | 93.1        | 99.1        | <b>99.8</b> | 98.7        | <b>100.0</b> | 61.9        | 93.5        | 93.3        | 32.1        | <b>100.0</b> | <u>99.1</u> | 94.8        | 88.0        |
| syn +<br>real<br>image  | DSC [S.14]                  | 31.2        | 83.0        | 49.6        | 56.5        | 57.9        | 73.7         | 31.3        | 96.0        | 63.4        | 38.8        | 61.9         | 64.7        | 54.4        | 58.6        |
|                         | Self6D [S.11]               | 38.9        | 75.2        | 36.9        | 65.6        | 57.9        | 67.0         | 19.6        | 99.0        | 94.1        | 16.2        | 77.9         | 68.2        | 50.1        | 58.9        |
|                         | GDR** [S.1, S.12]           | 85.0        | <b>99.8</b> | 96.5        | 99.3        | 93.0        | <b>100.0</b> | 65.3        | <b>99.9</b> | 98.1        | 73.4        | 86.9         | <b>99.6</b> | 86.3        | 91.0        |
|                         | Sock et al. [S.7]           | 37.6        | 78.6        | 65.6        | 65.6        | 52.5        | 48.8         | 35.1        | 89.2        | 64.5        | 41.5        | 80.9         | 70.7        | 60.5        | 60.6        |
|                         | real Self6D++** [S.1, S.10] | 75.4        | 94.9        | 97.0        | 99.5        | 86.6        | 98.9         | 68.3        | 99.0        | 96.1        | 41.9        | 99.4         | 98.9        | 94.3        | 88.5        |
|                         | SMOC-Net [S.9]              | 85.6        | 96.7        | 97.2        | 99.9        | 95.0        | <b>100.0</b> | 76.0        | 98.3        | <u>99.2</u> | 45.6        | <u>99.9</u>  | 98.9        | 94.0        | 91.3        |
|                         | TexPose [S.1]               | 80.9        | 99          | 94.8        | <u>99.7</u> | 92.6        | 97.4         | 83.4        | 94.9        | 93.4        | 79.3        | 99.8         | 98.3        | 78.9        | 91.7        |
|                         | DPODv2 [S.6]                | 80.0        | 99.7        | <b>99.2</b> | <u>99.6</u> | 95.1        | 98.9         | 79.5        | 99.6        | 99.8        | 72.3        | 99.4         | 96.3        | 96.8        | 93.5        |
|                         | Ours                        | 90.2        | 99.7        | <u>99.1</u> | <b>99.8</b> | <u>96.2</u> | 99.2         | 86.3        | <u>99.8</u> | <b>99.8</b> | 80.3        | 99.6         | 98.8        | <b>97.2</b> | <u>95.8</u> |
|                         | Ours+ICP                    | <b>90.3</b> | 99.7        | 99.1        | <b>99.8</b> | <b>96.4</b> | <u>99.3</u>  | <b>86.5</b> | <u>99.8</u> | <b>99.8</b> | <b>80.7</b> | 99.6         | 98.8        | <b>97.2</b> | <b>95.9</b> |
| syn +<br>real<br>labels | SO-Pose [S.2]               | -           | -           | -           | -           | -           | -            | -           | -           | -           | -           | -            | -           | -           | 96.0        |
|                         | Ours                        | 92.3        | 99.7        | <b>99.3</b> | <b>99.8</b> | <b>97.5</b> | 99.2         | 90.2        | 99.8        | <b>99.8</b> | 84.3        | 99.6         | 98.8        | 97.2        | 96.7        |
|                         | Ours+ICP                    | <b>92.7</b> | <u>99.7</u> | <b>99.3</b> | <b>99.8</b> | <b>97.5</b> | 99.2         | <b>90.7</b> | <u>99.8</u> | <b>99.8</b> | <b>84.5</b> | 99.6         | 98.8        | <b>97.3</b> | <b>96.8</b> |

**Table S.7:** YCB ADD-S and ADD(S) AUC [S.13] results of self-supervised 6DoF PE methods: Non-symmetric objects are evaluated with ADD AUC, and symmetric objects (annotated with \*) are evaluated with ADD-S AUC. To the best of our knowledge, selfd++ [S.10] is the only self supervision method that provided YCB results.

| Mode           | Metric | Method         | 002 master<br>chef can | 003 cracker<br>box | 004 sugar<br>box | 005 tomato<br>soup can | 006 mustard<br>bottle | 007 tuna fish<br>can | 008 pudding<br>box | 009 gelatin<br>box | 010 potted<br>meat can | 011 banana | 019 pitcher<br>base | 021 bleach<br>cleanser | 024 bowl* | 025 mug | 035 power<br>drill | 036 wood<br>block* | 037 scissors | 040 large<br>marker | 051 large<br>clamp* | 052 extra large<br>clamp | 061 foam<br>brick* | Mean |
|----------------|--------|----------------|------------------------|--------------------|------------------|------------------------|-----------------------|----------------------|--------------------|--------------------|------------------------|------------|---------------------|------------------------|-----------|---------|--------------------|--------------------|--------------|---------------------|---------------------|--------------------------|--------------------|------|
| syn+           | ADD-S  | Selfd++ [S.10] | 88.8                   | 94.2               | 95.8             | 90.8                   | 98.6                  | 97.5                 | 98.4               | 94.0               | 89.3                   | 98.5       | 98.9                | 93.5                   | 89.1      | 94.1    | 95.2               | 78.3               | 69.2         | 87.5                | 79.2                | 87.3                     | 95.5               | 91.1 |
|                | AUC    | Ours           | 88.7                   | 94.7               | 96.2             | 92.2                   | 99.5                  | 98.2                 | 98.3               | 95.2               | 92.7                   | 98.4       | 99.1                | 94.2                   | 92.3      | 95.2    | 95.5               | 81.2               | 71.3         | 89.2                | 83.4                | 90.2                     | 95.5               | 92.4 |
| real<br>images | ADD(S) | Selfd++ [S.10] | 88.9                   | 94.9               | 96.4             | 92.3                   | 99.7                  | 98.5                 | 98.5               | 95.5               | 92.9                   | 98.6       | 99.2                | 94.4                   | 92.5      | 95.4    | 95.7               | 81.4               | 71.5         | 89.4                | 83.6                | 90.4                     | 95.7               | 92.6 |
|                | AUC    | Ours           | 8.4                    | 84.9               | 88.0             | 79.4                   | 92.7                  | 89.7                 | 93.9               | 83.9               | 75.7                   | 91.8       | 92.1                | 84.5                   | 89.1      | 81.4    | 84.2               | 78.3               | 45.2         | 74.6                | 79.2                | 87.3                     | 95.5               | 80.0 |
| syn+           | ADD(S) | Selfd++ [S.10] | 13.7                   | 86.2               | 91.3             | 83.2                   | 92.7                  | 92.3                 | 94.3               | 84.2               | 76.3                   | 93.7       | 94.3                | 86.0                   | 92.3      | 83.2    | 86.3               | 81.2               | 62.3         | 75.6                | 83.4                | 90.2                     | 95.5               | 82.8 |
|                | AUC    | Ours+ICP       | 13.8                   | 86.5               | 91.5             | 83.3                   | 93.6                  | 92.5                 | 94.5               | 84.5               | 76.3                   | 93.9       | 94.5                | 86.1                   | 92.5      | 83.4    | 86.5               | 81.4               | 62.5         | 75.7                | 83.6                | 90.4                     | 95.7               | 83.0 |
| syn+           | ADD-S  | Selfd++ [S.10] | 93.8                   | 98.8               | 99.6             | 95.4                   | 100.0                 | 99.9                 | 63.3               | 92.9               | 91.1                   | 93.0       | 99.3                | 91.2                   | 87.2      | 96.4    | 99.7               | 68.6               | 78.9         | 93.0                | 81.7                | 86.9                     | 94.3               | 90.7 |
|                | AUC    | Ours           | 95.4                   | 98.8               | 99.2             | 96.3                   | 99.6                  | 99.8                 | 67.2               | 93.5               | 94.3                   | 95.2       | 99.5                | 93.7                   | 92.3      | 96.3    | 99.6               | 71.2               | 81.2         | 94.3                | 84.2                | 90.2                     | 94.8               | 92.2 |
| real<br>labels | ADD(S) | Selfd++ [S.10] | 95.7                   | 99.0               | 99.5             | 96.5                   | 99.8                  | 100.0                | 67.5               | 93.7               | 94.5                   | 95.5       | 99.7                | 93.9                   | 92.5      | 96.4    | 99.8               | 71.4               | 81.4         | 94.4                | 84.3                | 90.4                     | 95.2               | 92.4 |
|                | AUC    | Ours           | 56.7                   | 92.8               | 95.0             | 90.5                   | 94.7                  | 97.0                 | 42.1               | 84.7               | 78.2                   | 80.5       | 98.7                | 81.9                   | 87.2      | 86.6    | 93.6               | 68.6               | 61.3         | 81.7                | 81.7                | 86.9                     | 94.3               | 82.6 |
| real<br>labels | ADD(S) | Selfd++ [S.10] | 62.3                   | 95.3               | 94.9             | 93.2                   | 95.2                  | 97.0                 | 50.2               | 87.2               | 81.2                   | 83.2       | 99.1                | 83.2                   | 92.3      | 87.2    | 95.2               | 71.2               | 74.3         | 82.7                | 84.2                | 90.2                     | 94.8               | 85.4 |
|                | AUC    | Ours+ICP       | 62.7                   | 95.6               | 95.2             | 93.4                   | 95.5                  | 97.2                 | 50.5               | 87.5               | 81.4                   | 83.3       | 99.2                | 83.4                   | 92.5      | 87.3    | 95.4               | 71.4               | 74.4         | 82.8                | 84.3                | 90.4                     | 95.2               | 85.6 |

# References

- [S.1] Chen, H., Manhardt, F., Navab, N., Busam, B.: Texpose: Neural texture learning for self-supervised 6d object pose estimation. In: Proceedings of the IEEE/CVF Conference on Computer Vision and Pattern Recognition. pp. 4841–4852 (2023) [8](#), [9](#)
- [S.2] Di, Y., Manhardt, F., Wang, G., Ji, X., Navab, N., Tombari, F.: So-pose: Exploiting self-occlusion for direct 6d pose estimation. In: Proceedings of the IEEE/CVF International Conference on Computer Vision (ICCV). pp. 12396–12405 (October 2021) [9](#)
- [S.3] Hodan, T., Michel, F., Brachmann, E., Kehl, W., GlentBuch, A., Kraft, D., Drost, B., Vidal, J., Ihrke, S., Zabulis, X., et al.: Bop: Benchmark for 6d object pose estimation. In: Proceedings of the European conference on computer vision (ECCV). pp. 19–34 (2018) [3](#)
- [S.4] Li, Y., Wang, G., Ji, X., Xiang, Y., Fox, D.: Deepim: Deep iterative matching for 6d pose estimation. In: Proceedings of the European Conference on Computer Vision (ECCV). pp. 683–698 (2018) [9](#)
- [S.5] Manhardt, F., Arroyo, D.M., Rupperecht, C., Busam, B., Birdal, T., Navab, N., Tombari, F.: Explaining the ambiguity of object detection and 6d pose from visual data. In: Proceedings of the IEEE/CVF International Conference on Computer Vision (ICCV) (October 2019) [9](#)
- [S.6] Shugurov, I., Zakharov, S., Ilic, S.: Dpodv2: Dense correspondence-based 6 dof pose estimation. *IEEE transactions on pattern analysis and machine intelligence* **44**(11), 7417–7435 (2021) [9](#)
- [S.7] Sock, J., Garcia-Hernando, G., Armagan, A., Kim, T.K.: Introducing pose consistency and warp-alignment for self-supervised 6d object pose estimation in color images. In: 2020 International Conference on 3D Vision (3DV). pp. 291–300. IEEE (2020) [8](#), [9](#)
- [S.8] Sundermeyer, M., Marton, Z.C., Durner, M., Brucker, M., Triebel, R.: Implicit 3d orientation learning for 6d object detection from rgb images. In: Proceedings of the european conference on computer vision (ECCV). pp. 699–715 (2018) [9](#)
- [S.9] Tan, T., Dong, Q.: Smoc-net: Leveraging camera pose for self-supervised monocular object pose estimation. In: Proceedings of the IEEE/CVF Conference on Computer Vision and Pattern Recognition. pp. 21307–21316 (2023) [8](#), [9](#)
- [S.10] Wang, G., Manhardt, F., Liu, X., Ji, X., Tombari, F.: Occlusion-aware self-supervised monocular 6d object pose estimation. *IEEE Transactions on Pattern Analysis and Machine Intelligence* (2021) [8](#), [9](#), [10](#)
- [S.11] Wang, G., Manhardt, F., Shao, J., Ji, X., Navab, N., Tombari, F.: Self6d: Self-supervised monocular 6d object pose estimation. In: European Conference on Computer Vision. pp. 108–125. Springer (2020) [8](#), [9](#)
- [S.12] Wang, G., Manhardt, F., Tombari, F., Ji, X.: Gdr-net: Geometry-guided direct regression network for monocular 6d object pose estimation. In:

Proceedings of the IEEE/CVF Conference on Computer Vision and Pattern Recognition. pp. 16611–16621 (2021) 8, 9

- [S.13] Xiang, Y., Schmidt, T., Narayanan, V., Fox, D.: Posecnn: A convolutional neural network for 6d object pose estimation in cluttered scenes (2018) 10
- [S.14] Yang, Z., Yu, X., Yang, Y.: Dsc-posenet: Learning 6dof object pose estimation via dual-scale consistency. In: Proceedings of the IEEE/CVF Conference on Computer Vision and Pattern Recognition. pp. 3907–3916 (2021) 8, 9
